# Supplementary material
Source: PubMed Central journal article supplement (PMC4670765)
Supplement: CJN.03630415_CJN03630415SupplementaryData.pdf [file CJN.03630415_CJN03630415SupplementaryData.pdf]

## Supplementary material figure 1

### Figure 1A

|                                 | 0         | 5        | 10       | 15       | 20       | 25      | 30      | 35     |
|---------------------------------|-----------|----------|----------|----------|----------|---------|---------|--------|
| First malignancy %, (N)         | 0 (0)     | 1 (2)    | 3 (6)    | 6 (11)   | 11 (17)  | 17 (16) | 28 (11) | 33 (3) |
| Alive without malignancy %, (N) | 100 (231) | 91 (192) | 85 (168) | 79 (141) | 71 (109) | 58 (55) | 41 (17) | 36 (3) |
| Death without malignancy %, (N) | 0 (0)     | 8 (17)   | 12 (24)  | 15 (27)  | 18 (28)  | 25 (23) | 31 (13) | 31 (2) |
| N                               | 231       | 211      | 198      | 179      | 154      | 94      | 41      | 8      |

### Figure 1B

|                                 | 0         | 5        | 10       | 15       | 20       | 25      | 30      | 35     |
|---------------------------------|-----------|----------|----------|----------|----------|---------|---------|--------|
| First malignancy %, (N)         | 0 (0)     | 1 (2)    | 3 (6)    | 7 (11)   | 13 (17)  | 23 (16) | 41 (11) | 48 (3) |
| Alive without malignancy %, (N) | 100 (231) | 99 (192) | 97 (168) | 93 (141) | 87 (109) | 77 (55) | 59 (17) | 52 (3) |
| N                               | 231       | 194      | 174      | 152      | 126      | 71      | 28      | 6      |

### Figure 1C

|                                        | 0        | 1       | 2       | 3       | 4      |
|----------------------------------------|----------|---------|---------|---------|--------|
| Second de novo malignancy %, (N)       | 0 (0)    | 28 (8)  | 31 (7)  | 33 (6)  | 44 (6) |
| Alive without second malignancy %, (N) | 100 (53) | 61 (17) | 56 (12) | 49 (10) | 38 (5) |
| Death after first malignancy %, (N)    | 0 (0)    | 11 (3)  | 13 (3)  | 18 (4)  | 18 (2) |
| N                                      | 53       | 28      | 22      | 20      | 13     |

### Figure 1D

|                                        | 0        | 1       | 2       | 3       | 4      |
|----------------------------------------|----------|---------|---------|---------|--------|
| Second de novo malignancy %, (N)       | 0 (0)    | 31 (8)  | 36 (7)  | 40 (6)  | 54 (6) |
| Alive without second malignancy %, (N) | 100 (53) | 69 (17) | 64 (12) | 60 (10) | 46 (5) |
| N                                      | 53       | 25      | 19      | 16      | 11     |
